# Supplementary material for: HAP-FAST: a feasibility study incorporating qualitative, mechanistic and costing sub-studies alongside a randomised pilot trial comparing chest x-ray to low-dose CT scan and empirical antibiotics to antibiotics guided by the BIOFIRE® FILM ARRAY® pneumonia plus panel in adults with suspected non-ventilator-associated hospital-acquired pneumonia
Source: PubMed Central journal article supplement — BMJ Open. 2024 Jul 4;14(7):e088490. doi: 10.1136/bmjopen-2024-088490 (PMC11227820; doi:10.1136/bmjopen-2024-088490), 2024-07-04
Supplement: bmjopen-2024-088490.reviewer_comments.pdf [file bmjopen-2024-088490.reviewer_comments.pdf]

## PEER REVIEW HISTORY

BMJ Open publishes all reviews undertaken for accepted manuscripts. Reviewers are asked to complete a checklist review form (<http://bmjopen.bmj.com/site/about/resources/checklist.pdf>) and are provided with free text boxes to elaborate on their assessment. These free text comments are reproduced below.

## ARTICLE DETAILS

|                            |                                                                                                                                                                                                                                                                                                                                                            |
|----------------------------|------------------------------------------------------------------------------------------------------------------------------------------------------------------------------------------------------------------------------------------------------------------------------------------------------------------------------------------------------------|
| <b>TITLE (PROVISIONAL)</b> | HAPFAST- A feasibility study incorporating qualitative, mechanistic and costing sub-studies alongside a randomised pilot trial comparing chest x-ray to low-dose CT scan and empirical antibiotics to antibiotics guided by the BIOFIRE® FILM ARRAY® pneumonia panel in adults with suspected non-ventilator acquired Hospital-acquired Pneumonia (nv-HAP) |
| <b>AUTHORS</b>             | SHAFIQA, NATALIA; Aston, Stephen; Howard, Alex; Turtle, Lance; Abrams, Simon; Young, Bridget; Sherratt, Frances; Alvarez Nishio, Anica; Wilshaw, Stephanie; Jones, Ashley P.; Wootton, Dan                                                                                                                                                                 |

This article was not externally reviewed at BMJ Open. Protocols that have been independently assessed prior to submission to BMJ Open are usually fast-tracked to publication on the grounds that further substantial changes will not be possible. This independent assessment will usually be external, independent review for both a substantial grant award from a non-commercial or government funder and ethics approval.
