# Supplementary material for: HAP-FAST: a feasibility study incorporating qualitative, mechanistic and costing sub-studies alongside a randomised pilot trial comparing chest x-ray to low-dose CT scan and empirical antibiotics to antibiotics guided by the BIOFIRE® FILM ARRAY® pneumonia plus panel in adults with suspected non-ventilator-associated hospital-acquired pneumonia
Source: PubMed Central journal article supplement — BMJ Open. 2024 Jul 4;14(7):e088490. doi: 10.1136/bmjopen-2024-088490 (PMC11227820; doi:10.1136/bmjopen-2024-088490), 2024-07-04
Supplement: bmjopen-2024-088490supp002.pdf [file bmjopen-2024-088490supp002.pdf]

**Table 4:** Schedule for Assessments and Follow-Up

| Specific Activity                                                                              | Stage 1 randomisation Day 0 | Stage 2 Randomisation | Day 1          | Day 2          | Day 3          | Day 4          | Day 5          | Day 6          | Day 7          | Day 8          | Day 9          | Day 10         | Day 28 (+/- 7 days) | Day 90 (+/- 14 days) |
|------------------------------------------------------------------------------------------------|-----------------------------|-----------------------|----------------|----------------|----------------|----------------|----------------|----------------|----------------|----------------|----------------|----------------|---------------------|----------------------|
| Assessment of eligibility                                                                      | X                           | X                     |                |                |                |                |                |                |                |                |                |                |                     |                      |
| Concomitant medication check                                                                   | X                           |                       |                |                |                |                |                |                |                |                |                |                |                     |                      |
| Randomisation                                                                                  | X                           | X                     |                |                |                |                |                |                |                |                |                |                |                     |                      |
| Urine pregnancy test as required pre Chest X-ray/CT scan                                       | X                           |                       |                |                |                |                |                |                |                |                |                |                |                     |                      |
| Chest X-ray                                                                                    | X                           |                       |                |                |                |                |                |                |                |                |                |                |                     |                      |
| CT scan                                                                                        | X                           |                       |                |                |                |                |                |                |                |                |                |                |                     |                      |
| Sputum sample                                                                                  |                             | X                     |                |                | <sup>3</sup> X |                |                |                |                |                |                |                | <sup>3</sup> X      |                      |
| FAPP                                                                                           |                             | X                     |                |                |                |                |                |                |                |                |                |                |                     |                      |
| Informed consent                                                                               |                             | <sup>2</sup> X        | <sup>2</sup> X | <sup>2</sup> X | <sup>2</sup> X | <sup>2</sup> X | <sup>2</sup> X | <sup>2</sup> X | <sup>2</sup> X | <sup>2</sup> X | <sup>2</sup> X | <sup>2</sup> X | <sup>2</sup> X      | <sup>2</sup> X       |
| Past Medical history                                                                           | X                           |                       |                |                |                |                |                |                |                |                |                |                |                     |                      |
| Admission related data (date, time, symptoms, co-morbidities, ward type, reason for admission, | X                           |                       |                |                |                |                |                |                |                |                |                |                |                     |                      |

|                                                                                                                                   |                |   |                |                |                |                |                |                |                |                |                |                |   |   |
|-----------------------------------------------------------------------------------------------------------------------------------|----------------|---|----------------|----------------|----------------|----------------|----------------|----------------|----------------|----------------|----------------|----------------|---|---|
| clinical frailty score)                                                                                                           |                |   |                |                |                |                |                |                |                |                |                |                |   |   |
| Patient demographics (age, sex, postcode, height, weight, calculated BMI)                                                         | X              |   |                |                |                |                |                |                |                |                |                |                |   |   |
| Details of antibiotic use                                                                                                         | X              | X | X              | X              | X              | X              | X              | X              | X              | X              | X              | X              | X | X |
| Vital signs (temperature, blood pressure, pulse rate, oxygen saturation rate, respiratory rate, NEWS2 score)                      | X              |   | <sup>1</sup> X |   |   |
| Record clinician's description of symptoms                                                                                        | X              |   | <sup>1</sup> X |   |   |
| Record clinician's respiratory exam findings                                                                                      | X              |   | <sup>1</sup> X |   |   |
| Blood test results (haemoglobin, platelets, white blood count, neutrophils, lymphocytes, creatinine, c-reactive protein and urea) | X              |   | <sup>1</sup> X |   |   |
| CAP-sym score                                                                                                                     | <sup>4</sup> X |   | <sup>1</sup> X | X | X |
| Record survival status                                                                                                            | X              |   | X              | X              | X              | X              | X              | X              | X              | X              | X              | X              | X | X |
| EQ-5D-5L                                                                                                                          | <sup>4</sup> X |   |                |                |                |                |                |                |                |                |                | <sup>1</sup> X | X | X |

|                                         |                 |  |  |  |                |  |  |  |  |  |  |  |                |   |
|-----------------------------------------|-----------------|--|--|--|----------------|--|--|--|--|--|--|--|----------------|---|
| Nasal swab                              | <sup>35</sup> X |  |  |  | <sup>3</sup> X |  |  |  |  |  |  |  | <sup>3</sup> X |   |
| Research blood sample                   | <sup>35</sup> X |  |  |  | <sup>3</sup> X |  |  |  |  |  |  |  | <sup>3</sup> X |   |
| Post-discharge Indirect Cost Survey     |                 |  |  |  |                |  |  |  |  |  |  |  |                | X |
| Record microbial results from admission |                 |  |  |  |                |  |  |  |  |  |  |  |                | X |
| Record any further imaging and findings |                 |  |  |  |                |  |  |  |  |  |  |  |                | X |

<sup>1</sup> collected until day 10 or discharge

<sup>2</sup> collected as soon as possible up until discharge

<sup>3</sup> collected for the exploratory sub-study only

<sup>4</sup> not to be collected until written informed consent is obtained.

<sup>5</sup> must be collected within 24 hours of stage 1 randomisation
